# Supplementary material for: Effect of Renal Impairment on Pharmacokinetics and Safety of Ensitrelvir, a SARS-CoV-2 3CL Protease Inhibitor
Source: Springer Nature journal article supplement (doi:10.1007/s40121-024-00946-x), 2024-03-01
Supplement: MOESM1 [file 26858902]

# Effect of Renal Impairment on Pharmacokinetics and Safety of Ensitrelvir, a SARS-CoV-2 3CL Protease Inhibitor

Takayuki Katsube, PhD<sup>1</sup>, Kezbor Safwan, MD<sup>2</sup>, Ryosuke Shimizu<sup>1</sup>, and Ryuji Kubota, PhD<sup>1</sup>

<sup>1</sup>Clinical Pharmacology & Pharmacokinetics, Shionogi & Co., Ltd., 3-13, Imabashi 3-chome, Chuo-ku, Osaka 541-0042, Japan

<sup>2</sup>Shionogi Inc. 400 Campus Drive, 4th Fl. Florham Park, NJ 07932, US

E-mail address

Takayuki Katsube: [takayuki.katsube@shionogi.co.jp](mailto:takayuki.katsube@shionogi.co.jp)

Kezbor Safwan: [safwan.kezbor@shionogi.com](mailto:safwan.kezbor@shionogi.com)

Ryosuke Shimizu: [ryosuke.shimizu@shionogi.co.jp](mailto:ryosuke.shimizu@shionogi.co.jp)

Ryuji Kubota: [ryuji.kubota@shionogi.co.jp](mailto:ryuji.kubota@shionogi.co.jp)

Corresponding author: Takayuki Katsube, [takayuki.katsube@shionogi.co.jp](mailto:takayuki.katsube@shionogi.co.jp)

Clinical Pharmacology & Pharmacokinetics, Shionogi & Co., Ltd., 3-13, Imabashi 3-chome, Chuo-ku, Osaka 541-0042, Japan

## Supplemental Material

### Supplemental Figure S1 Spaghetti plot of plasma concentration profiles of ensitrelvir

(a) Participants with normal renal function

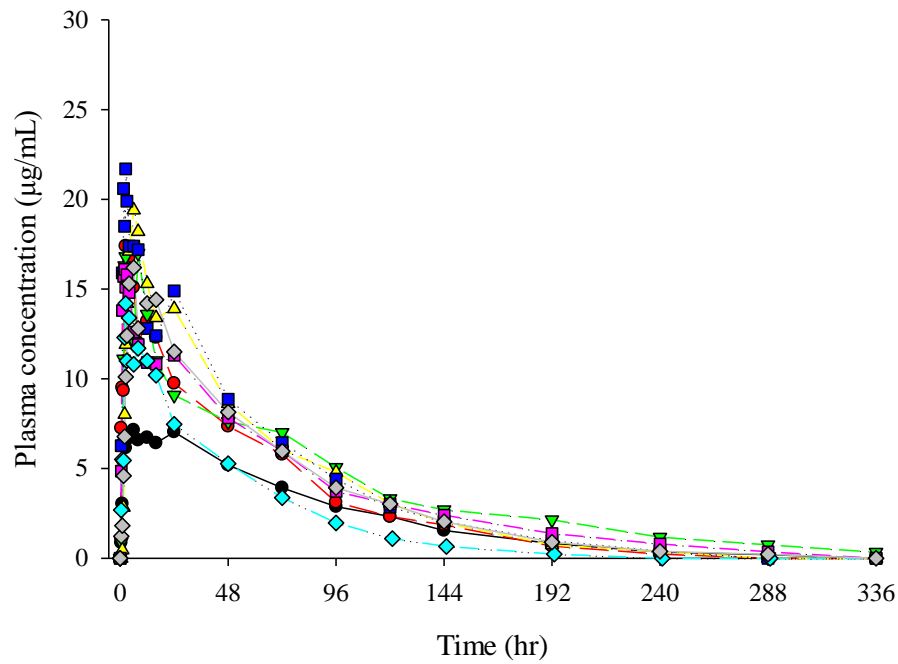

(b) Participants with mild renal impairment

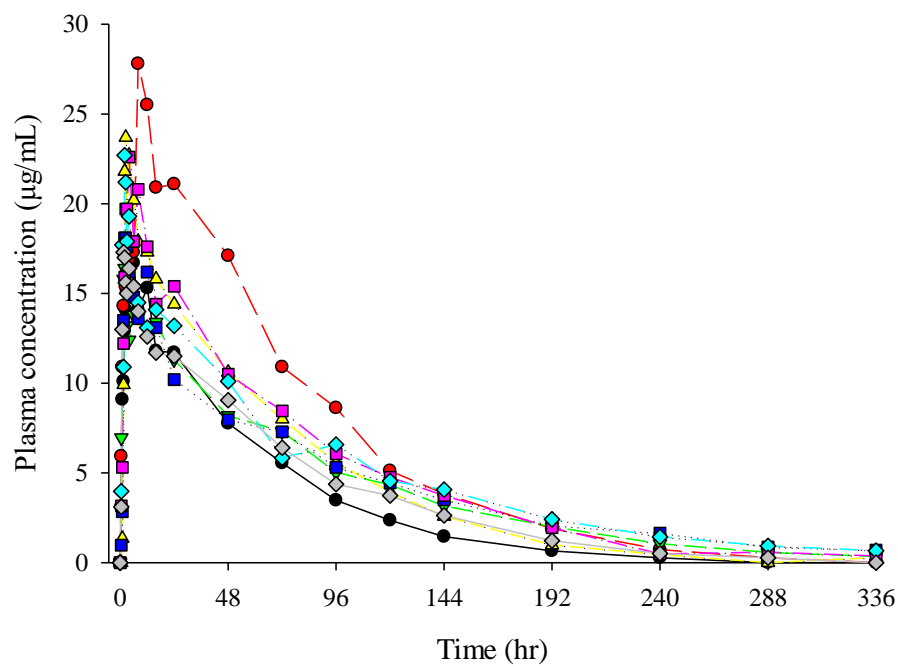

Supplemental Figure S1 (continued)

(c) Participants with moderate renal impairment

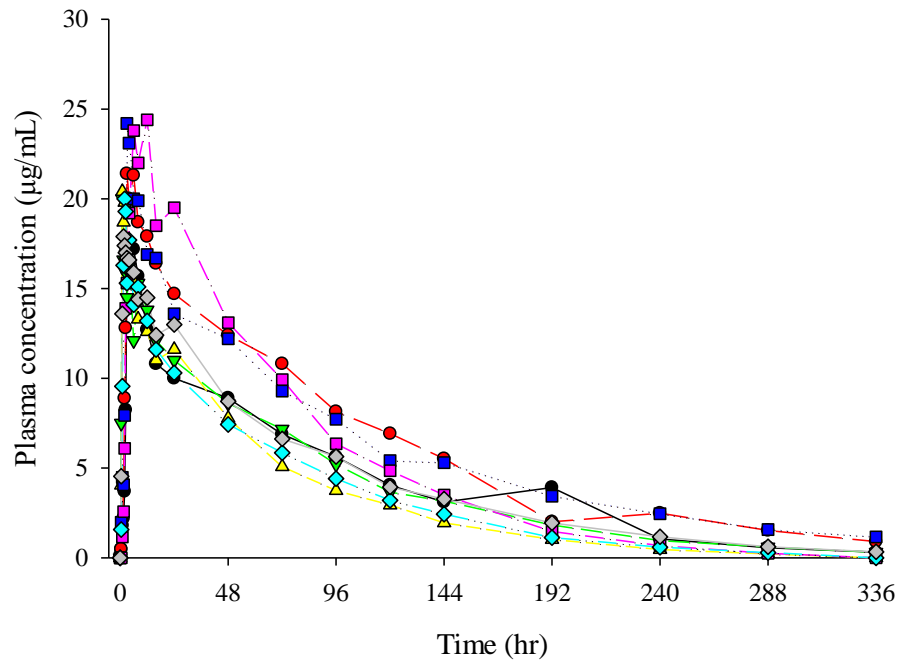

(d) Participants with severe renal impairment

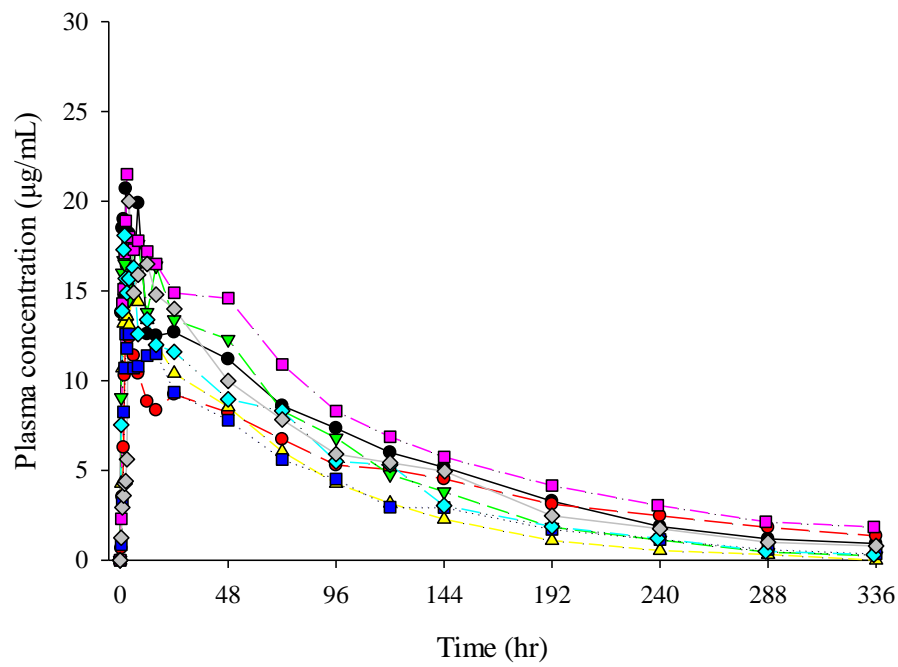

Supplemental Table S1

## Incidence of treatment-emergent adverse events by severity

| System organ class<br>Preferred term                    | Normal<br>renal<br>function<br>(N = 8) | Mild renal<br>impairment<br>(N = 8) | Moderate<br>renal<br>impairment<br>(N = 8) | Severe renal<br>impairment<br>(N = 8) | Overall<br>(N = 32) |
|---------------------------------------------------------|----------------------------------------|-------------------------------------|--------------------------------------------|---------------------------------------|---------------------|
| Any TEAE; n (%)                                         |                                        |                                     |                                            |                                       |                     |
| Mild                                                    | 0                                      | 2 (25.0)                            | 1 (12.5)                                   | 0                                     | 3 (9.4)             |
| Moderate                                                | 0                                      | 1 (12.5)                            | 1 (12.5)                                   | 0                                     | 2 (6.3)             |
| Severe                                                  | 0                                      | 0                                   | 0                                          | 0                                     | 0                   |
| Blood and lymphatic system<br>disorders                 |                                        |                                     |                                            |                                       |                     |
| Anaemia                                                 |                                        |                                     |                                            |                                       |                     |
| Mild                                                    | 0                                      | 1 (12.5)                            | 0                                          | 0                                     | 1 (3.1)             |
| Moderate                                                | 0                                      | 0                                   | 0                                          | 0                                     | 0                   |
| Severe                                                  | 0                                      | 0                                   | 0                                          | 0                                     | 0                   |
| Gastrointestinal disorders                              |                                        |                                     |                                            |                                       |                     |
| Dry mouth                                               |                                        |                                     |                                            |                                       |                     |
| Mild                                                    | 0                                      | 1 (12.5)                            | 0                                          | 0                                     | 1 (3.1)             |
| Moderate                                                | 0                                      | 0                                   | 0                                          | 0                                     | 0                   |
| Severe                                                  | 0                                      | 0                                   | 0                                          | 0                                     | 0                   |
| General disorders and<br>administration site conditions |                                        |                                     |                                            |                                       |                     |
| Vessel puncture site<br>haemorrhage                     |                                        |                                     |                                            |                                       |                     |
| Mild                                                    | 0                                      | 1 (12.5)                            | 1 (12.5)                                   | 0                                     | 2 (6.3)             |
| Moderate                                                | 0                                      | 0                                   | 0                                          | 0                                     | 0                   |
| Severe                                                  | 0                                      | 0                                   | 0                                          | 0                                     | 0                   |
| Investigations                                          |                                        |                                     |                                            |                                       |                     |
| Glomerular filtration rate<br>decreased                 |                                        |                                     |                                            |                                       |                     |
| Mild                                                    | 0                                      | 0                                   | 0                                          | 0                                     | 0                   |
| Moderate                                                | 0                                      | 0                                   | 1 (12.5)                                   | 0                                     | 1 (3.1)             |
| Severe                                                  | 0                                      | 0                                   | 0                                          | 0                                     | 0                   |
| Metabolism and nutrition<br>disorders                   |                                        |                                     |                                            |                                       |                     |
| Hypertriglyceridaemia                                   |                                        |                                     |                                            |                                       |                     |
| Mild                                                    | 0                                      | 0                                   | 0                                          | 0                                     | 0                   |
| Moderate                                                | 0                                      | 1 (12.5)                            | 0                                          | 0                                     | 1 (3.1)             |
| Severe                                                  | 0                                      | 0                                   | 0                                          | 0                                     | 0                   |

TEAE = treatment emergent adverse event.

Supplemental Table S2

## Incidence of treatment-related adverse events by severity

| System organ class<br>Preferred term | Normal renal<br>function<br>(N = 8) | Mild renal<br>impairment<br>(N = 8) | Moderate<br>renal<br>impairment<br>(N = 8) | Severe renal<br>impairment<br>(N = 8) | Overall<br>(N = 32) |
|--------------------------------------|-------------------------------------|-------------------------------------|--------------------------------------------|---------------------------------------|---------------------|
| Any treatment-related TEAE; n (%)    |                                     |                                     |                                            |                                       |                     |
| Mild                                 | 0                                   | 1 (12.5)                            | 0                                          | 0                                     | 1 (3.1)             |
| Moderate                             | 0                                   | 0                                   | 1 (12.5)                                   | 0                                     | 1 (3.1)             |
| Severe                               | 0                                   | 0                                   | 0                                          | 0                                     | 0                   |
| Gastrointestinal disorders           |                                     |                                     |                                            |                                       |                     |
| Dry mouth                            |                                     |                                     |                                            |                                       |                     |
| Mild                                 | 0                                   | 1 (12.5)                            | 0                                          | 0                                     | 1 (3.1)             |
| Moderate                             | 0                                   | 0                                   | 0                                          | 0                                     | 0                   |
| Severe                               | 0                                   | 0                                   | 0                                          | 0                                     | 0                   |
| Investigations                       |                                     |                                     |                                            |                                       |                     |
| Glomerular filtration rate decreased |                                     |                                     |                                            |                                       |                     |
| Mild                                 | 0                                   | 0                                   | 0                                          | 0                                     | 0                   |
| Moderate                             | 0                                   | 0                                   | 1 (12.5)                                   | 0                                     | 1 (3.1)             |
| Severe                               | 0                                   | 0                                   | 0                                          | 0                                     | 0                   |

TEAE = treatment emergent adverse event.

A treatment-related AE was defined as an AE that could be reasonably explained as having been caused by the study intervention.
